# Supplementary material for: A Key Major Guideline for Engineering Bioactive Multicomponent Nanofunctionalization for Biomedicine and Other Applications: Fundamental Models Confirmed by Both Direct and Indirect Evidence
Source: Hindawi journal article supplement (doi:10.1155/2017/2867653), 2017-01-01

## Graphical Abstract

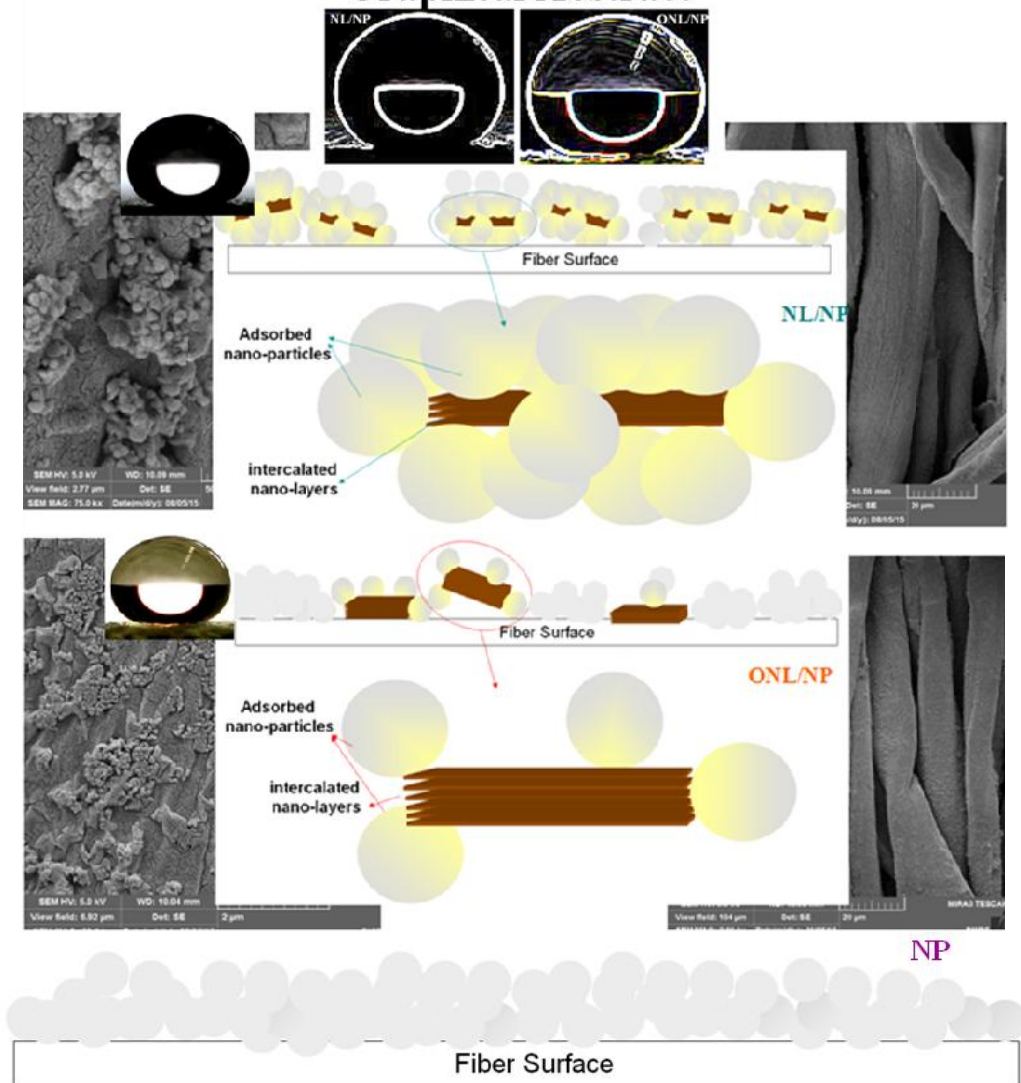

**Modeling of surface orientation of  
nano-structures confirmed by  
microscopic evidence**

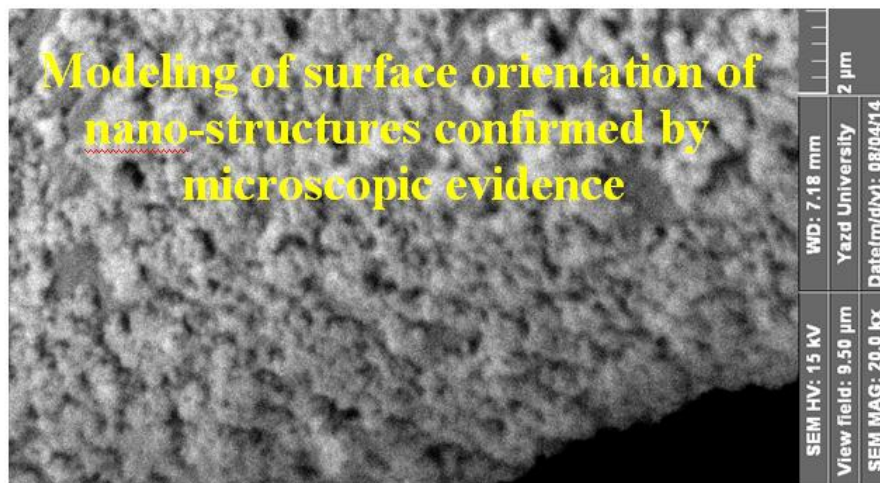

Supplement: f1 [file 2867653.f1.zip]
